# Supplementary material for: Characterisation of Bacterial Isolates from Infected Post-Operative Patients in a Malaysian Tertiary Heart Care Centre
Source: MDPI journal article supplement (doi:10.3390/ijerph18189828), 2021-09-17
Supplement: s1 [file s1]

TableS1: Degree of biofilm formation and resistance gene among the patient's specimen with the resistance pattern of bacterial isolates to 11 antibiotic classes.

| Isolates                            | Source            | Antibiotic-resistant phenotypes                                                      | Antibiotic-resistant genotypes           |
|-------------------------------------|-------------------|--------------------------------------------------------------------------------------|------------------------------------------|
| <b><i>Staphylococcus aureus</i></b> |                   |                                                                                      |                                          |
| SA1                                 | Tracheal aspirate |    | <i>ermA, ermC, tetM, aacA-aphD</i>       |
| SA2                                 | Pus/wound         |    | <i>ermA, ermC, tetM, aacA-aphD</i>       |
| SA3                                 | Blood             |    | <i>ermA, ermC, tetM, aacA-aphD</i>       |
| SA4                                 | Blood             |    | <i>ermA, ermC, tetM, aacA-aphD</i>       |
| SA5                                 | Blood             |    | <i>ermA, ermC, tetM, mecA</i>            |
| SA6                                 | Blood             |    | <i>ermA, ermC, mecA</i>                  |
| SA7                                 | Pus/wound         |    | <i>ermA, aacA-aphD, mecA</i>             |
| SA8                                 | Blood             |    | <i>ermA, tetM</i>                        |
| SA9 <sup>++</sup>                   | Wound             |    | <i>ermC, tetM, mecA</i>                  |
| SA10                                | Pus/wound         |    | <i>ermB, ermC, tetM, aacA-aphD, mecA</i> |
| SA11                                | Blood             |    | <i>ermA, ermC, tetM, aacA-aphD</i>       |
| SA12                                | Blood             |    | <i>ermA, ermC, tetM, mecA</i>            |
| SA13                                | Pus/wound         |   | <i>ermA, ermC, tetM, aacA-aphD, mecA</i> |
| SA14                                | Blood             |  | <i>ermC, tetM, mecA</i>                  |
| SA15 <sup>+</sup>                   | Blood             |  | <i>ermC</i>                              |
| SA16                                | Blood             |  | <i>ermC, mecA</i>                        |
| SA17                                | Pus/wound         |  | <i>mecA</i>                              |
| SA18 <sup>+</sup>                   | Tracheal aspirate |  | <i>ermC, aacA-aphD, mecA</i>             |
| SA19 <sup>+</sup>                   | Pus/wound         |  | <i>ermC, tetM</i>                        |
| SA20 <sup>+</sup>                   | Pus/wound         |  | <i>ermA, ermC, tetM, aacA-aphD, mecA</i> |
| SA21 <sup>+++</sup>                 | Blood             |  | <i>ermC, tetM, aacA-aphD, mecA</i>       |
| SA22                                | Blood             |  | <i>ermC, aacA-aphD, mecA</i>             |

|                                    |                   |  |  |                                                                                        |
|------------------------------------|-------------------|--|--|----------------------------------------------------------------------------------------|
| SA23                               | Pus/wound         |  |  | <i>ermC, tetM, aacA-aphD, mecA</i>                                                     |
| SA24 <sup>+</sup>                  | Blood             |  |  | <i>ermC, tetM, aacA-aphD, mecA</i>                                                     |
| SA25                               | Blood             |  |  | <i>ermC, tetM, aacA-aphD, mecA</i>                                                     |
| SA26                               | Blood             |  |  | <i>ermC, aacA-aphD, mecA</i>                                                           |
| SA27                               | Tissue            |  |  | <i>ermC, tetM, aacA-aphD, mecA</i>                                                     |
| SA28                               | Blood             |  |  | <i>ermC, tetM, aacA-aphD, mecA</i>                                                     |
| SA29 <sup>+</sup>                  | Blood             |  |  | <i>ermC, tetM</i>                                                                      |
| SA30 <sup>+</sup>                  | Blood             |  |  | <i>tetM, aacA-aphD</i>                                                                 |
| <b><i>Klebsiella pneumonia</i></b> |                   |  |  |                                                                                        |
| KP1                                | Tracheal aspirate |  |  | <i>bla<sub>CTX-M</sub>, bla<sub>SHV</sub>, bla<sub>GES</sub>,</i>                      |
| KP2                                | Tracheal aspirate |  |  | <i>bla<sub>CTX-M</sub>, bla<sub>SHV</sub>, bla<sub>GES</sub>,</i>                      |
| KP3                                | Pus/wound         |  |  | <i>bla<sub>CTX-M</sub>, bla<sub>SHV</sub>, bla<sub>GES</sub>,</i>                      |
| KP4                                | Pus/wound         |  |  | <i>bla<sub>CTX-M</sub>, bla<sub>SHV</sub>, bla<sub>GES</sub>, bla<sub>VIM</sub></i>    |
| KP5                                | Tracheal aspirate |  |  | <i>bla<sub>CTX-M</sub>, bla<sub>SHV</sub>, bla<sub>GES</sub></i>                       |
| KP6                                | Tracheal aspirate |  |  | <i>bla<sub>CTX-M</sub>, bla<sub>SHV</sub>, bla<sub>GES</sub>, bla<sub>VIM</sub></i>    |
| KP7 <sup>+</sup>                   | Urine             |  |  | <i>bla<sub>CTX-M</sub>, bla<sub>SHV</sub></i>                                          |
| KP8                                | Urine             |  |  | <i>bla<sub>CTX-M</sub>, bla<sub>SHV</sub></i>                                          |
| KP9                                | Tissue/biopsy     |  |  | <i>bla<sub>CTX-M</sub>, bla<sub>SHV</sub>, bla<sub>GES</sub></i>                       |
| KP10                               | Tracheal aspirate |  |  | <i>bla<sub>CTX-M</sub>, bla<sub>SHV</sub>, bla<sub>GES</sub>,</i>                      |
| KP11                               | Urine             |  |  | <i>bla<sub>CTX-M</sub>, bla<sub>SHV</sub>, bla<sub>GES</sub></i>                       |
| KP12 <sup>++</sup>                 | Tracheal aspirate |  |  | <i>bla<sub>CTX-M</sub>, bla<sub>SHV</sub>, bla<sub>GES</sub></i>                       |
| KP13                               | Tracheal aspirate |  |  | <i>bla<sub>CTX-M</sub>, bla<sub>SHV</sub>, bla<sub>GES</sub>, bla<sub>OXA-58</sub></i> |
| KP14                               | Tracheal aspirate |  |  | <i>bla<sub>CTX-M</sub>, bla<sub>SHV</sub>, bla<sub>GES</sub></i>                       |
| KP15                               | Tracheal aspirate |  |  | <i>bla<sub>CTX-M</sub>, bla<sub>SHV</sub>, bla<sub>GES</sub>, bla<sub>OXA-58</sub></i> |
| KP16                               | Blood             |  |  | <i>bla<sub>CTX-M</sub>, bla<sub>SHV</sub>, bla<sub>GES</sub></i>                       |
| KP17                               | Pus/wound         |  |  | <i>bla<sub>CTX-M</sub>, bla<sub>SHV</sub>, bla<sub>GES</sub></i>                       |
| KP18 <sup>++</sup>                 | Blood             |  |  | <i>bla<sub>CTX-M</sub>, bla<sub>SHV</sub>, bla<sub>GES</sub>,</i>                      |
| KP19                               | Tissue/biopsy     |  |  | <i>bla<sub>CTX-M</sub>, bla<sub>SHV</sub>, bla<sub>GES</sub></i>                       |
| KP20                               | Urine             |  |  | <i>bla<sub>CTX-M</sub>, bla<sub>SHV</sub></i>                                          |

|                                       |                    |                                                                                                                                                                                                                                                                                                                                                                                                                                          |                                                                                                                                                                                 |
|---------------------------------------|--------------------|------------------------------------------------------------------------------------------------------------------------------------------------------------------------------------------------------------------------------------------------------------------------------------------------------------------------------------------------------------------------------------------------------------------------------------------|---------------------------------------------------------------------------------------------------------------------------------------------------------------------------------|
| KP21 <sup>++</sup>                    | Tracheal aspirate  |                                                                                                                                                                                    | <i>bla</i> <sub>CTX-M</sub> , <i>bla</i> <sub>SHV</sub> , <i>bla</i> <sub>GES</sub> , <i>bla</i> <sub>VIM</sub>                                                                 |
| KP22                                  | Tracheal aspirate  |                                                                                                                                                                                                                                                                                                                                                                                                                                          | <i>bla</i> <sub>CTX-M</sub> , <i>bla</i> <sub>SHV</sub> , <i>bla</i> <sub>GES</sub>                                                                                             |
| KP23 <sup>+</sup>                     | Blood              |                                                                                                                                                                                    | <i>bla</i> <sub>CTX-M</sub> , <i>bla</i> <sub>SHV</sub> , <i>bla</i> <sub>GES</sub> , <i>bla</i> <sub>VIM</sub>                                                                 |
| KP24                                  | Pus/wound          |                                                                                                                                                                                    | <i>mcr-1</i> , <i>bla</i> <sub>CTX-M</sub> , <i>bla</i> <sub>SHV</sub> , <i>bla</i> <sub>GES</sub>                                                                              |
| KP25                                  | Tracheal aspirate  |                                                                                                 | <i>bla</i> <sub>CTX-M</sub> , <i>bla</i> <sub>SHV</sub> , <i>bla</i> <sub>GES</sub> , <i>bla</i> <sub>VIM</sub> , <i>bla</i> <sub>NDM-1</sub> , <i>bla</i> <sub>OXA-23</sub>    |
| KP26                                  | Tracheal aspirate  |                | <i>bla</i> <sub>CTX-M</sub> , <i>bla</i> <sub>SHV</sub> ,                                                                                                                       |
| KP27                                  | Pus/wound          |                                                                                                                                                                                                                                                                     | <i>bla</i> <sub>CTX-M</sub> , <i>bla</i> <sub>SHV</sub> , <i>bla</i> <sub>GES</sub> , <i>bla</i> <sub>OXA-23</sub>                                                              |
| KP28                                  | Tracheal aspirate  |                | <i>bla</i> <sub>CTX-M</sub> , <i>bla</i> <sub>SHV</sub> , <i>bla</i> <sub>GES</sub> , <i>bla</i> <sub>NDM-1</sub> , <i>bla</i> <sub>OXA-23</sub>                                |
| KP29                                  | Urine              |                                                                                                                                                                                                                                                                                                                                                                                                                                          | <i>bla</i> <sub>CTX-M</sub> , <i>bla</i> <sub>SHV</sub> , <i>bla</i> <sub>GES</sub>                                                                                             |
| KP30                                  | Urine              |                | <i>bla</i> <sub>CTX-M</sub> , <i>bla</i> <sub>SHV</sub> , <i>bla</i> <sub>GES</sub> ,                                                                                           |
| KP31 <sup>+</sup>                     | Tissue/biopsy      |                | <i>bla</i> <sub>CTX-M</sub> , <i>bla</i> <sub>SHV</sub> , <i>bla</i> <sub>GES</sub> ,                                                                                           |
| KP32 <sup>++</sup>                    | Tracheal aspirate  |                | <i>bla</i> <sub>CTX-M</sub> , <i>bla</i> <sub>SHV</sub> , <i>bla</i> <sub>GES</sub> , <i>bla</i> <sub>NDM-1</sub>                                                               |
| KP33                                  | Bronchial aspirate |                                                                                                                                                                                                                                                                                                                                                                                                                                          | <i>bla</i> <sub>CTX-M</sub> , <i>bla</i> <sub>SHV</sub> , <i>bla</i> <sub>NDM-1</sub>                                                                                           |
| KP34                                  | Tracheal aspirate  |                                                                                                 | <i>bla</i> <sub>CTX-M</sub> , <i>bla</i> <sub>SHV</sub> , <i>bla</i> <sub>NDM-1</sub>                                                                                           |
| KP35 <sup>+</sup>                     | Tracheal aspirate  |                                                                                                                                                                                                                                                                                                                                                                                                                                          | <i>bla</i> <sub>CTX-M</sub> , <i>bla</i> <sub>SHV</sub> , <i>bla</i> <sub>GES</sub> , <i>bla</i> <sub>NDM-1</sub>                                                               |
| KP36                                  | Tracheal aspirate  |                                                                                                 | <i>bla</i> <sub>CTX-M</sub> , <i>bla</i> <sub>SHV</sub> , <i>bla</i> <sub>GES</sub> , <i>bla</i> <sub>VIM</sub>                                                                 |
| KP37                                  | Blood              |                                                                                                                                                                                    | <i>bla</i> <sub>CTX-M</sub> , <i>bla</i> <sub>SHV</sub> , <i>bla</i> <sub>GES</sub>                                                                                             |
| KP38 <sup>+</sup>                     | Tracheal aspirate  |                | <i>bla</i> <sub>CTX-M</sub> , <i>bla</i> <sub>SH</sub>                                                                                                                          |
| KP39 <sup>++</sup>                    | Tracheal aspirate  |                                                                                                                                                                                                                                                                                                                                                                                                                                          | <i>bla</i> <sub>CTX-M</sub> , <i>bla</i> <sub>SHV</sub> , <i>bla</i> <sub>GES</sub> ,                                                                                           |
| KP40 <sup>+++</sup>                   | Sputum             |                                                                                             | <i>bla</i> <sub>CTX-M</sub> , <i>bla</i> <sub>SHV</sub> , <i>bla</i> <sub>GES</sub> ,                                                                                           |
| KP41                                  | Tracheal aspirate  |                                                                                                                                                                                                                                                                                                                                                                                                                                          | <i>bla</i> <sub>CTX-M</sub> , <i>bla</i> <sub>SHV</sub> , <i>bla</i> <sub>GES</sub> ,                                                                                           |
| KP42 <sup>+</sup>                     | Blood              |                                                                                                                                                                                                                                                                 | <i>bla</i> <sub>CTX-M</sub> , <i>bla</i> <sub>SHV</sub> , <i>bla</i> <sub>VIM</sub> , <i>bla</i> <sub>NDM-1</sub> , <i>bla</i> <sub>OXA-23</sub>                                |
| KP43 <sup>+++</sup>                   | Tracheal aspirate  |                                                                                                                                                                                                                                                                                                                                                                                                                                          | <i>bla</i> <sub>CTX-M</sub> , <i>bla</i> <sub>SHV</sub>                                                                                                                         |
| KP44                                  | Urine              |      | <i>bla</i> <sub>CTX-M</sub> , <i>bla</i> <sub>SHV</sub> , <i>bla</i> <sub>GES</sub> , <i>bla</i> <sub>NDM-1</sub> , <i>bla</i> <sub>OXA-23</sub> , <i>bla</i> <sub>OXA-58</sub> |
| KP45                                  | Blood              |                                                                                                                                                                                                                                                                                                                                                                                                                                          | <i>bla</i> <sub>CTX-M</sub> , <i>bla</i> <sub>SHV</sub> , <i>bla</i> <sub>NDM-1</sub>                                                                                           |
| KP46                                  | Tracheal aspirate  |                                                                                                                                                                                                                                                                                                                                                                                                                                          | <i>bla</i> <sub>CTX-M</sub> , <i>bla</i> <sub>SHV</sub> , <i>bla</i> <sub>GES</sub> ,                                                                                           |
| <b><i>Acinetobacter baumannii</i></b> |                    |                                                                                                                                                                                                                                                                                                                                                                                                                                          |                                                                                                                                                                                 |
| AB1                                   | Tracheal aspirate  |                                                                                                                                                                                                                                                                                                                                                      | <i>pmrA</i> , <i>bla</i> <sub>CTX-M</sub> , <i>bla</i> <sub>GES</sub> , <i>bla</i> <sub>VIM</sub> , <i>bla</i> <sub>NDM-1</sub> , <i>bla</i> <sub>OXA-23</sub>                  |

|                                      |                    |  |                                                                                                                                                                |
|--------------------------------------|--------------------|--|----------------------------------------------------------------------------------------------------------------------------------------------------------------|
| AB2                                  | Tracheal aspirate  |  | <i>bla</i> <sub>SHV</sub> , <i>bla</i> <sub>IMP</sub> ,                                                                                                        |
| AB3 <sup>++</sup>                    | Tracheal aspirate  |  | <i>bla</i> <sub>CTX-M</sub> , <i>bla</i> <sub>SHV</sub> , <i>bla</i> <sub>OXA-23</sub>                                                                         |
| AB4 <sup>+</sup>                     | Tracheal aspirate  |  | <i>bla</i> <sub>SHV</sub> , <i>bla</i> <sub>NDM-1</sub> , <i>bla</i> <sub>OXA-23</sub>                                                                         |
| AB5 <sup>+</sup>                     | Bronchial aspirate |  | <i>bla</i> <sub>SHV</sub> , <i>bla</i> <sub>GES</sub> , <i>bla</i> <sub>OXA-23</sub>                                                                           |
| AB6 <sup>++</sup>                    | Blood              |  | <i>bla</i> <sub>SHV</sub> , <i>bla</i> <sub>KPC-2</sub>                                                                                                        |
| AB7 <sup>+</sup>                     | Pus/wound          |  | <i>pmrA</i> , <i>bla</i> <sub>CTX-M</sub> , <i>bla</i> <sub>SHV</sub> , <i>bla</i> <sub>GES</sub> , <i>bla</i> <sub>NDM-1</sub> , <i>bla</i> <sub>OXA-23</sub> |
| <b><i>Pseudomonas aeruginosa</i></b> |                    |  |                                                                                                                                                                |
| PA1                                  | Tracheal aspirate  |  | <i>bla</i> <sub>CTX-M</sub> , <i>bla</i> <sub>SHV</sub> , <i>bla</i> <sub>GES</sub> , <i>bla</i> <sub>OXA-23</sub>                                             |
| PA2                                  | Tracheal aspirate  |  | <i>bla</i> <sub>CTX-M</sub> , <i>bla</i> <sub>SHV</sub> , <i>bla</i> <sub>GES</sub> , <i>bla</i> <sub>OXA-23</sub>                                             |
| PA3 <sup>+</sup>                     | Tracheal aspirate  |  | <i>bla</i> <sub>CTX-M</sub> , <i>bla</i> <sub>SHV</sub> , <i>bla</i> <sub>GES</sub> , <i>bla</i> <sub>OXA-23</sub>                                             |
| PA4                                  | Tracheal aspirate  |  | <i>bla</i> <sub>CTX-M</sub> , <i>bla</i> <sub>SHV</sub> , <i>bla</i> <sub>GES</sub> , <i>bla</i> <sub>OXA-23</sub>                                             |
| PA5 <sup>+</sup>                     | Bronchial aspirate |  | <i>bla</i> <sub>CTX-M</sub> , <i>bla</i> <sub>KPC-2</sub> , <i>bla</i> <sub>GES</sub> , <i>bla</i> <sub>OXA-23</sub>                                           |
| PA6 <sup>+</sup>                     | Blood              |  | <i>bla</i> <sub>CTX-M</sub> , <i>bla</i> <sub>SHV</sub> , <i>bla</i> <sub>GES</sub> , <i>bla</i> <sub>OXA-23</sub>                                             |
| PA7                                  | Pus/wound          |  | <i>bla</i> <sub>CTX-M</sub> , <i>bla</i> <sub>SHV</sub> , <i>bla</i> <sub>GES</sub> , <i>bla</i> <sub>OXA-23</sub>                                             |
| PA8                                  | Tracheal aspirate  |  | <i>bla</i> <sub>CTX-M</sub> , <i>bla</i> <sub>SHV</sub> , <i>bla</i> <sub>KPC-2</sub> , <i>bla</i> <sub>GES</sub> , <i>bla</i> <sub>OXA-23</sub>               |
| PA9 <sup>+</sup>                     | Tracheal aspirate  |  | <i>bla</i> <sub>CTX-M</sub> , <i>bla</i> <sub>KPC-2</sub> , <i>bla</i> <sub>GES</sub> , <i>bla</i> <sub>OXA-23</sub>                                           |
| PA10                                 | Tracheal aspirate  |  | <i>bla</i> <sub>CTX-M</sub> , <i>bla</i> <sub>SHV</sub> , <i>bla</i> <sub>GES</sub> , <i>bla</i> <sub>OXA-23</sub>                                             |
| PA11 <sup>++</sup>                   | Tracheal aspirate  |  | <i>bla</i> <sub>CTX-M</sub> , <i>bla</i> <sub>SHV</sub> , <i>bla</i> <sub>KPC-2</sub> , <i>bla</i> <sub>GES</sub> , <i>bla</i> <sub>OXA-23</sub>               |
| PA12                                 | Bronchial aspirate |  | <i>bla</i> <sub>CTX-M</sub> , <i>bla</i> <sub>SHV</sub> , <i>bla</i> <sub>GES</sub> , <i>bla</i> <sub>OXA-23</sub>                                             |
| PA13                                 | Blood              |  | <i>bla</i> <sub>CTX-M</sub> , <i>bla</i> <sub>SHV</sub> , <i>bla</i> <sub>GES</sub> , <i>bla</i> <sub>OXA-23</sub>                                             |
| PA14                                 | Pus/wound          |  | <i>bla</i> <sub>CTX-M</sub> , <i>bla</i> <sub>SHV</sub> , <i>bla</i> <sub>GES</sub>                                                                            |
| PA15 <sup>+</sup>                    | Tracheal aspirate  |  | <i>bla</i> <sub>CTX-M</sub> , <i>bla</i> <sub>SHV</sub> , <i>bla</i> <sub>GES</sub> , <i>bla</i> <sub>OXA-23</sub>                                             |
| PA16                                 | Tracheal aspirate  |  | <i>bla</i> <sub>CTX-M</sub> , <i>bla</i> <sub>SHV</sub> , <i>bla</i> <sub>GES</sub> , <i>bla</i> <sub>OXA-23</sub>                                             |
| PA17                                 | Tracheal aspirate  |  | <i>bla</i> <sub>CTX-M</sub> , <i>bla</i> <sub>SHV</sub> , <i>bla</i> <sub>KPC-2</sub> , <i>bla</i> <sub>GES</sub> , <i>bla</i> <sub>OXA-23</sub>               |
| PA18                                 | Tracheal aspirate  |  | <i>bla</i> <sub>CTX-M</sub> , <i>bla</i> <sub>SHV</sub> , <i>bla</i> <sub>GES</sub>                                                                            |
| PA19 <sup>+++</sup>                  | Bronchial aspirate |  | <i>bla</i> <sub>CTX-M</sub> , <i>bla</i> <sub>SHV</sub> , <i>bla</i> <sub>GES</sub> , <i>bla</i> <sub>SPM-1</sub>                                              |
| PA20                                 | Blood              |  | <i>bla</i> <sub>CTX-M</sub> , <i>bla</i> <sub>SHV</sub> , <i>bla</i> <sub>GES</sub> , <i>bla</i> <sub>OXA-23</sub>                                             |
| PA21                                 | Pus/wound          |  | <i>bla</i> <sub>CTX-M</sub> , <i>bla</i> <sub>SHV</sub> , <i>bla</i> <sub>GES</sub> , <i>bla</i> <sub>KPC-2</sub>                                              |
| PA22                                 | Tracheal aspirate  |  | <i>bla</i> <sub>CTX-M</sub> , <i>bla</i> <sub>SHV</sub> , <i>bla</i> <sub>KPC-2</sub> , <i>bla</i> <sub>GES</sub> , <i>bla</i> <sub>OXA-23</sub>               |

|                                  |                    |  |  |  |                                                                     |
|----------------------------------|--------------------|--|--|--|---------------------------------------------------------------------|
| PA23                             | Tracheal aspirate  |  |  |  | <i>bla</i> CTX-M, <i>bla</i> SHV, <i>bla</i> GES, <i>bla</i> OXA-23 |
| PA24                             | Tracheal aspirate  |  |  |  | <i>bla</i> CTX-M, <i>bla</i> SHV, <i>bla</i> GES, <i>bla</i> OXA-23 |
| PA25                             | Tracheal aspirate  |  |  |  | <i>bla</i> CTX-M, <i>bla</i> SHV, <i>bla</i> GES, <i>bla</i> OXA-23 |
| PA26                             | Bronchial aspirate |  |  |  | <i>bla</i> CTX-M, <i>bla</i> SHV, <i>bla</i> GES, <i>bla</i> OXA-23 |
| PA27                             | Blood              |  |  |  | <i>bla</i> CTX-M, <i>bla</i> SHV, <i>bla</i> GES, <i>bla</i> NDM-1  |
| PA28                             | Pus/wound          |  |  |  | <i>bla</i> CTX-M, <i>bla</i> SHV, <i>bla</i> GES,                   |
| PA29 <sup>+</sup>                | Tracheal aspirate  |  |  |  | <i>bla</i> CTX-M, <i>bla</i> SHV, <i>bla</i> GES,                   |
| PA30 <sup>+</sup>                | Tracheal aspirate  |  |  |  | <i>bla</i> CTX-M, <i>bla</i> SHV, <i>bla</i> GES, <i>bla</i> OXA-23 |
| PA31 <sup>+</sup>                | Tracheal aspirate  |  |  |  | <i>bla</i> CTX-M, <i>bla</i> SHV, <i>bla</i> GES,                   |
| PA32 <sup>+++</sup>              | Tracheal aspirate  |  |  |  | <i>bla</i> CTX-M, <i>bla</i> SHV, <i>bla</i> GES,                   |
| PA33                             | Bronchial aspirate |  |  |  | <i>bla</i> CTX-M, <i>bla</i> SHV, <i>bla</i> GES <i>bla</i> SPM-1   |
| <b><i>Streptococcus</i> spp.</b> |                    |  |  |  |                                                                     |
| S1 <sup>+</sup>                  | Blood              |  |  |  |                                                                     |
| S2 <sup>+</sup>                  | Blood              |  |  |  | <i>ermB</i>                                                         |
| S3                               | Blood              |  |  |  | <i>ermB</i> , <i>tetM</i> , <i>pmr(A)</i>                           |
| S4                               | Blood              |  |  |  | <i>tetM</i> , <i>mef(A)</i> , <i>pmr(A)</i> ,                       |
| S5                               | Blood              |  |  |  | <i>ermB</i> , <i>tetM</i> , <i>pmr(A)</i> ,                         |
| S6 <sup>++</sup>                 | Blood              |  |  |  | <i>tetM</i> , <i>pmr(A)</i>                                         |
| S7 <sup>++</sup>                 | Blood              |  |  |  | <i>tetK</i> , <i>tetM</i> , <i>pmr(A)</i>                           |
| S8                               | Blood              |  |  |  | <i>ermB</i> , <i>tetM</i> , <i>pmr(A)</i>                           |
| S9 <sup>++</sup>                 | Blood              |  |  |  | <i>tetM</i>                                                         |
| S10 <sup>+</sup>                 | Blood              |  |  |  | <i>ermB</i> , <i>tetM</i> , <i>pmr(A)</i>                           |
| S11                              | Blood              |  |  |  | <i>tetM</i> , <i>pmr(A)</i>                                         |

**<sup>+</sup>: weak biofilm producer, <sup>++</sup>: moderate biofilm producer, <sup>+++</sup>: strong biofilm producer**

|               |                         |               |                   |              |                |
|---------------|-------------------------|---------------|-------------------|--------------|----------------|
| Penicillin    | Fluoroquinolone         | Macrolide     | Lipoglycopeptides | Sulphonamide | Aminoglycoside |
| Cephalosporin | Nitroheterocycle furans | Glycylcycline | Annamycin         | Carbapenem   |                |
